# Supplementary material for: Fatty acid bioaccessibility and structural breakdown fromin vitrodigestion of almond particles
Source: Royal Society of Chemistry journal article supplement (doi:10.1039/c9fo00789j), 2019-01-01
Supplement: c9fo00789j1.pdf [file c9fo00789j1.pdf]

**Table 1:** Fatty acid composition of whole almonds used for in vitro digestion determined by direct acid extraction and Folch extraction (Section 2.7). Direct acid extraction was carried out on almond powder ( $10.08 \pm 0.93$  mg dry mass) and extractable fatty acid comprised  $58.76 \pm 2.44\%$  of initial almond dry mass. Folch extraction was carried out on almond powder ( $10.42 \pm 2.80$  mg dry mass) and extractable fatty acid comprised  $54.77 \pm 2.68\%$  of initial almond dry mass. All values are means  $\pm$  standard deviation ( $n = 8$  for direct acid extraction and  $n = 9$  for Folch extraction).

| Fatty acid                   | Direct acid extraction         |                                        |                                 | Folch extraction               |                                        |                                 |
|------------------------------|--------------------------------|----------------------------------------|---------------------------------|--------------------------------|----------------------------------------|---------------------------------|
|                              | Mass fatty acid extracted (mg) | Percent of initial almond dry mass (%) | Percent of total fatty acid (%) | Mass fatty acid extracted (mg) | Percent of initial almond dry mass (%) | Percent of total fatty acid (%) |
| <b>Palmitic acid (C16:0)</b> | $0.40 \pm 0.05$                | $3.98 \pm 0.16$                        | $6.74 \pm 0.07$                 | $0.38 \pm 0.11$                | $3.62 \pm 0.22$                        | $6.61 \pm 0.33$                 |
| <b>Oleic acid (C18:1)</b>    | $4.28 \pm 0.57$                | $42.32 \pm 1.78$                       | $71.67 \pm 0.35$                | $3.90 \pm 0.97$                | $37.64 \pm 2.29$                       | $68.79 \pm 3.95$                |
| <b>Linoleic acid (C18:2)</b> | $1.26 \pm 0.17$                | $12.45 \pm 0.55$                       | $21.09 \pm 0.29$                | $1.40 \pm 0.42$                | $13.51 \pm 2.56$                       | $24.60 \pm 3.95$                |

**Table 2.** pH of digesta. When a pH adjustment was called for by the digestion protocol (Section 2.3.1), the pH was recorded both before and after the adjustment was made. All values are means  $\pm$  standard deviation ( $n = 3$ ).

| <b>Time (min)</b> |                       | <b>Human Gastric Simulator</b> | <b>Shaking water bath</b> | <b>Shaking water bath with only pH adjusted water</b> |
|-------------------|-----------------------|--------------------------------|---------------------------|-------------------------------------------------------|
| <b>0</b>          |                       | 2.02 $\pm$ 0.03                | 2.00 $\pm$ 0.05           | 2.02 $\pm$ 0.05                                       |
| <b>1</b>          |                       | 2.37 $\pm$ 0.07                | 2.17 $\pm$ 0.04           | 2.21 $\pm$ 0.11                                       |
| <b>5</b>          |                       | 2.70 $\pm$ 0.11                | 2.61 $\pm$ 0.05           | 2.73 $\pm$ 0.14                                       |
| <b>15</b>         |                       | 3.15 $\pm$ 0.13                | 3.14 $\pm$ 0.07           | 3.52 $\pm$ 0.22                                       |
| <b>30</b>         |                       | 3.38 $\pm$ 0.13                | 3.39 $\pm$ 0.06           | 4.07 $\pm$ 0.09                                       |
| <b>60</b>         | Before adjusting to 3 | 3.52 $\pm$ 0.17                | 3.80 $\pm$ 0.07           | 4.45 $\pm$ 0.09                                       |
|                   | After adjusting to 3  | 3.01 $\pm$ 0.03                | 3.01 $\pm$ 0.04           | 3.00 $\pm$ 0.01                                       |
| <b>120</b>        | Before adjusting to 2 | 3.47 $\pm$ 0.13                | 3.52 $\pm$ 0.02           | 3.94 $\pm$ 0.01                                       |
|                   | After adjusting to 2  | 2.06 $\pm$ 0.01                | 2.04 $\pm$ 0.01           | 2.03 $\pm$ 0.02                                       |
| <b>180</b>        | End of gastric phase  | 2.90 $\pm$ 0.09                | 2.75 $\pm$ 0.03           | 3.00 $\pm$ 0.03                                       |
|                   | Before adjusting to 7 | 6.12 $\pm$ 0.10                | 6.27 $\pm$ 0.06           | 3.06 $\pm$ 0.02                                       |
|                   | After adjusting to 7  | 7.00 $\pm$ 0.03                | 7.02 $\pm$ 0.04           | 7.03 $\pm$ 0.03                                       |
| <b>185</b>        |                       | 6.76 $\pm$ 0.07                | 6.68 $\pm$ 0.17           | 6.46 $\pm$ 0.12                                       |
| <b>195</b>        |                       | 6.72 $\pm$ 0.11                | 6.80 $\pm$ 0.33           | 5.88 $\pm$ 0.11                                       |
| <b>240</b>        | Before adjusting to 7 | 6.57 $\pm$ 0.07                | 6.70 $\pm$ 0.10           | 5.57 $\pm$ 0.08                                       |
|                   | After adjusting to 7  | 6.99 $\pm$ 0.06                | 6.93 $\pm$ 0.03           | 7.02 $\pm$ 0.03                                       |
| <b>300</b>        | Before adjusting to 7 | 6.85 $\pm$ 0.09                | 6.95 $\pm$ 0.02           | 6.34 $\pm$ 0.10                                       |
|                   | After adjusting to 7  | 6.98 $\pm$ 0.06                | 6.96 $\pm$ 0.01           | 7.05 $\pm$ 0.01                                       |
| <b>360</b>        |                       | 6.99 $\pm$ 0.05                | 7.02 $\pm$ 0.03           | 6.53 $\pm$ 0.10                                       |
